## RESEARCH ARTICLE

# The correlation of obesity status with serum 25-hydroxyvitamin D in US Asian adults: NHANES 2011–2018

Linjie Qiu<sup>1</sup>\*, Yan Ren<sup>1</sup>\*, Jixin Li<sup>1</sup>, Meijie Li<sup>1</sup>, Wenjie Li<sup>2</sup>, Lingli Qin<sup>1</sup>, Jin Zhang<sup>1</sup>\*, Feng Gao<sup>1</sup>\*

**1** Prevention and Treatment Center, Xiyuan Hospital, China Academy of Chinese Medical Sciences, Beijing, China, **2** Graduate school, Shanxi University of Chinese Medicine, Shanxi, China

\* These authors contributed equally to this work.

\* [zjmzy2000@hotmail.com](mailto:zjmzy2000@hotmail.com) (JZ); [xyyzwb@163.com](mailto:xyyzwb@163.com) (FG)

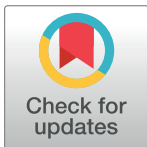

## Abstract

### OPEN ACCESS

**Citation:** Qiu L, Ren Y, Li J, Li M, Li W, Qin L, et al. (2024) The correlation of obesity status with serum 25-hydroxyvitamin D in US Asian adults: NHANES 2011–2018. PLoS ONE 19(4): e0301327. <https://doi.org/10.1371/journal.pone.0301327>

**Editor:** Mohammad Reza Mahmoodi, Kerman University of Medical Sciences Physiology Research Center, ISLAMIC REPUBLIC OF IRAN

**Received:** December 14, 2023

**Accepted:** March 14, 2024

**Published:** April 16, 2024

**Copyright:** © 2024 Qiu et al. This is an open access article distributed under the terms of the [Creative Commons Attribution License](https://creativecommons.org/licenses/by/4.0/), which permits unrestricted use, distribution, and reproduction in any medium, provided the original author and source are credited.

**Data Availability Statement:** All relevant data are within the manuscript and its [Supporting Information](#) files.

**Funding:** Scientific and technological innovation project of China Academy of Chinese Medical Sciences (C12021A03005). The funders had no role in study design, data collection and analysis, decision to publish, or preparation of the manuscript.

**Competing interests:** The authors have declared that no competing interests exist.

## Background

There is a correlation between obesity and 25-hydroxyvitamin D (25OHD) that tends to be negative. However, this relationship varies among different races. In this study, Asian adults with and without obesity were compared in terms of their levels of 25OHD.

## Methods

We carried out a cross-sectional analysis on 2664 non-Hispanic Asian adults who participated in the National Health and Nutrition Examination Survey (NHANES) conducted between 2011 and 2018. To examine the connection between obese status, body mass index (BMI), waist circumference (WC) and weight, and 25OHD, we ran multivariate linear regression models and multivariate logistic regression models.

## Results

After adjusting for all confounding factors, obesity status shows a significant positive correlation with vitamin D deficiency (model 3: OR = 2.318, 95% CI: 1.317, 4.082). This positive correlation remains significant in males (males: OR = 2.713, 95% CI: 1.398, 5.217). In all three models, a negative association was observed between obesity status and 25OHD (model 1:  $\beta = -4.535$ , 95% CI: -6.987, -2.083; model 2  $\beta = -4.249$ , 95% CI: -6.549, -2.039; model 3  $\beta = -1.734$ , 95% CI: -7.285, 3.816). After controlling for covariates, there was a significant negative correlation between WC and 25OHD when stratified by gender and obesity status in both males with and without obesity (males with obesity:  $\beta = -1.461$ , 95% CI: -2.485, -0.436; males without obesity:  $\beta = -0.855$ , 95% CI: -1.499, -0.210). In males with obesity, there was a very strong positive connection between body weight and 25OHD ( $\beta = 0.912$ , 95% CI: 0.227, 1.597). In addition, neither gender's obese individuals showed a significant link between BMI and 25OHD.

## Conclusion

This study demonstrated a positive correlation between obesity and vitamin D deficiency and a negative correlation between obesity and 25OHD in Asian American adults. Additionally, among male obese individuals, there was a significant negative correlation between WC and 25OHD, an observation that needs to be validated in further prospective studies.

## Introduction

Obesity and vitamin D deficiency are two major public health concerns worldwide [1,2]. Obesity is a chronic metabolic disease that is complex and mostly linked to excessive accumulation of fat [3]. A Vitamin D is a fat-soluble vitamin that is primarily stored in adipose tissue [4], making the correlation between obesity and vitamin D deficiency a popular research topic.

Obese patients often suffer from nutrient deficiencies, including vitamin D deficiency [5]. Previous research has linked obesity to an increased risk of vitamin D insufficiency [6,7], Mahdih et al. conducted a meta-analysis on the relationship between vitamin D and body fat mass, and found that the level of 25-hydroxyvitamin D (25OHD) was negatively correlated with body fat mass [8]. Zahra et al. conducted a systematic review of cross-sectional studies on abdominal obesity and serum vitamin D levels, and found that increased waist circumference (WC) was associated with an increased risk of vitamin D deficiency and insufficiency in adults [9]. Poonam et al. found through meta-analysis that a decrease in weight and percentage of body fat in obese subjects increased serum vitamin D levels [10], however, a prospective study conducted in Switzerland found no association between 25OHD levels and weight gain [11], and another prospective study also indicated that there was no association between vitamin D status and weight or WC gain [12]. The results of studies on the relationship between various obesity-related indicators and vitamin D levels are inconsistent. Furthermore, differences in skin color can affect vitamin D synthesis and status, potentially impacting the relationship between obesity and vitamin D across different races [13,14]. Epidemiological surveys have shown that Asian populations are more likely to experience vitamin D insufficiency compared to North American and European populations [15]. The most recent National Health and Nutrition Examination Survey (NHANES) conducted between 2011 and 2018 revealed a concerning increase in all markers of obesity among non-Hispanic Asians in the United States [2]. However, research on the relationship between obesity-related indicators and vitamin D in Asian adults is limited.

Therefore, with the aid of a nationally representative sample, this study examined the connection between vitamin D deficiency and obesity in Asian adults. We also evaluated the relationship between weight, WC, and body mass index (BMI) and vitamin D.

## Methods

### Data sources

The National Center for Health Statistics (NCHS) conducts a nationwide survey of health and nutrition data using the NHANES, which employs a sophisticated sampling design. The survey has been conducted every two years since 1999 and collects demographic, nutritional, exam, laboratory, and questionnaire data [16,17]. Starting in 2011, NHANES began oversampling non-Hispanic Asians. For this study, we pooled survey data for a total of four cycles spanning 2011–2018. The total number of participants from 2011–2018 was 39156. We excluded 34,590

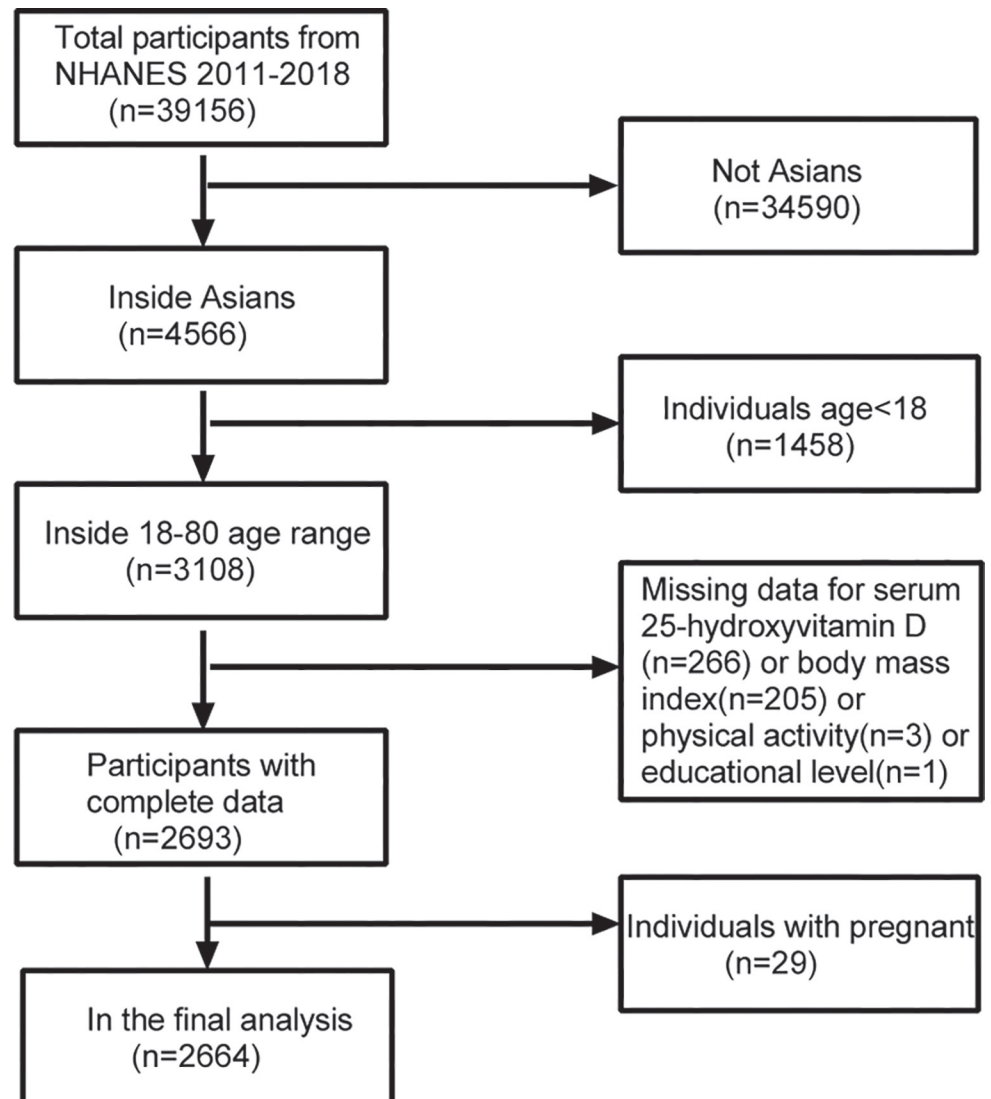

**Fig 1.** From chart of sample selection from the NHANES 2011–2018.

<https://doi.org/10.1371/journal.pone.0301327.g001>

non-Asian participants as well as 1,458 individuals under the age of 18. Additionally, we excluded participants with missing 25OHD data ( $n = 206$ ), BMI data ( $n = 205$ ), physical activity data ( $n = 3$ ), education level data ( $n = 1$ ), or pregnancy status ( $n = 29$ ). Ultimately, we included complete data from 2664 Asian adults for analysis (Fig 1). Detailed methodology and NHANES survey information are available on the official website. The National Center for Health Statistics' ethical review committee approved the survey, and all participants provided their informed consent by signing a form.

### Evaluation of exposures

Exposure variables mainly included obesity status, WC, BMI and weight. Obesity was defined using the World Health Organization (WHO)'s criteria for Asians, which states a BMI greater than or equal to 27.5 [18]. Data for WC, BMI and weight were obtained from body measurements in NHANES. Trained health technicians gathered these measurements in the Mobile

Examination Center. Weight in kilograms divided by height in meters squared was used to compute BMI, which was then rounded to the nearest decimal point. The right ilium of the pelvis was located by palpating the hip region, and the waist was measured by the NHANES health technicians. The measurement was made at the participant's typical expiration time, with the accuracy up to 0.1cm. More details could be found in the NHANES Manual for Anthropometric procedures([https://wwwn.cdc.gov/nchs/data/nhanes/2015-2016/manuals/2016\\_Anthropometry\\_Procedures\\_Manual.pdf](https://wwwn.cdc.gov/nchs/data/nhanes/2015-2016/manuals/2016_Anthropometry_Procedures_Manual.pdf)).

## Outcome

This study measured the serum 25OHD level as its outcome, which is considered the most accurate indicator of vitamin D levels due to its half-life of approximately three weeks [19]. 25-hydroxyvitamin D2 (25OHD2) and 25-hydroxyvitamin D3 (25OHD3) are combined to form total 25OHD. In the test, 25OHD3 and 25OHD2 were quantitatively detected in human serum using ultra-high performance liquid chromatography-tandem mass spectrometry (UHPLC-MS/MS). The NHANES Laboratory Procedures Manual goes into great detail about how to collect and prepare samples ([https://wwwn.cdc.gov/nchs/data/nhanes/2015-2016/manuals/2016\\_MEC\\_Laboratory\\_Procedures\\_Manual.pdf](https://wwwn.cdc.gov/nchs/data/nhanes/2015-2016/manuals/2016_MEC_Laboratory_Procedures_Manual.pdf).) Additionally, based on recommendations from the medical research institute, we define levels of 25OHD less than 30nm/L as indicative of vitamin D deficiency, and levels of 25OHD greater than or equal to 30nm/L as indicative of non-deficiency in vitamin D [20].

## Covariates for analysis

Information on gender, age, education level, ratio of family income, and physical activity (classified as inactive, less active, or namely active as recommended by Physical Activity Guidelines) [21] were obtained from self-reported questionnaires. Detailed procedures for serum uric acid, serum sodium, glycohemoglobin, fasting glucose, total cholesterol (TC), triglycerides (TG), HDL-cholesterol (HDL-C) and LDL-cholesterol (LDL-C) were available in the NHANES website for laboratory data.

## Statistical methods

We analyzed all data statistically using the package R version 3.4.3 (<http://www.R-project.org>) and EmpowerStats software (<http://www.empowerstats.com>), and took into account sampling weights according to the NCHS-edited analytical guideline. We used means and standard deviations to report continuous data, and for categorical data, we used percentages. Statistical significance was set at 0.05. In order to determine the relationship between the presence of obesity, BMI, WC, weight, and 25OHD levels, we ran multivariate linear regression models. Furthermore, we conducted an analysis that accounted for covariates. Specifically, Model 1 did not include any adjusted covariates; Model 2 included adjustments for age and sex; and Model 3 included adjustments for all the covariates listed in Table 1. Additionally, we performed subgroup analyses based on gender and obesity status.

## Ethics approval and consent to participate

The National Center for Health Statistics Ethics Review Committee granted ethics approval. All methods were carried out in accordance with relevant guidelines and regulations (declaration of Helsinki). All individuals provided written informed consent before participating in the study.

**Table 1. Weighted characteristics of study sample with and without obesity.**

| Characteristic                         | Obesity(n = 671) | Non-obesity(n = 1993) | P value |
|----------------------------------------|------------------|-----------------------|---------|
| Age(years)                             | 44.60 ± 15.41    | 44.58 ± 16.58         | 0.980   |
| Gender (%)                             |                  |                       | 0.040   |
| Male                                   | 50.62            | 46.08                 |         |
| Female                                 | 49.38            | 53.92                 |         |
| Educational level (%)                  |                  |                       | 0.059   |
| Less than 9th grade                    | 6.43             | 6.95                  |         |
| 9-11th grade                           | 6.48             | 7.04                  |         |
| High school graduate/GED or equivalent | 15.25            | 14.35                 |         |
| Some college or AA degree              | 23.63            | 18.73                 |         |
| College graduate or above              | 48.20            | 52.92                 |         |
| Physical activity (%)                  |                  |                       | 0.021   |
| Inactive                               | 71.59            | 76.30                 |         |
| Less active                            | 6.51             | 6.51                  |         |
| Namely active                          | 21.90            | 17.19                 |         |
| Ratio of family income to poverty (%)  | 3.14 ± 1.64      | 3.16 ± 1.67           | 0.761   |
| Weight(kg)                             | 83.41 ± 14.88    | 61.53 ± 10.55         | <0.001  |
| Body mass index(kg/m <sup>2</sup> )    | 31.14 ± 3.81     | 23.02 ± 2.58          | <0.001  |
| Waist Circumference(cm)                | 102.13 ± 9.49    | 83.87 ± 8.41          | <0.001  |
| Serum uric acid (μmol/L)               | 357.51 ± 87.30   | 312.91 ± 76.91        | <0.001  |
| Serum sodium (mmol/L)                  | 139.23 ± 2.31    | 139.32 ± 2.42         | 0.427   |
| Glycohemoglobin (%)                    | 5.99 ± 1.11      | 5.63 ± 0.83           | <0.001  |
| Fasting Glucose(mmol/L)                | 6.31 ± 1.58      | 5.77 ± 1.31           | <0.001  |
| HDL-Cholesterol (mmol/L)               | 1.21 ± 0.32      | 1.46 ± 0.41           | <0.001  |
| LDL-Cholesterol (mmol/L)               | 2.99 ± 0.89      | 2.83 ± 0.92           | 0.011   |
| Triglyceride (mmol/L)                  | 1.63 ± 1.13      | 1.24 ± 1.01           | <0.001  |
| Total Cholesterol (mmol/L)             | 5.00 ± 0.96      | 4.90 ± 1.04           | 0.032   |
| 25-hydroxyvitamin D (nmol/L)           | 59.36 ± 27.95    | 63.89 ± 28.48         | <0.001  |

**Notes:** Mean ± SD for continuous variables; P-value was calculated by weighted linear regression model. % for categorical variables; P-value was calculated by weighted chi-square test.

<https://doi.org/10.1371/journal.pone.0301327.t001>

## Results

### Characteristics of the participants

There were differences in health data obtained between Asian obese adults and non-obese adults in terms of demographics and laboratory tests (Table 1). Male subjects with obesity were more prevalent than female subjects among Asian adults compared to their non-obese counterparts. Besides, weight, BMI, WC, serum uric acid, glycohemoglobin, fasting glucose, TC, TG, HDL-C and LDL-C were statistically different between the two groups. Notably, serum hydroxyvitamin D levels were lower in obese Asian adults than in non-obese adults of Asian descent (59.36 ± 27.95 vs 63.89 ± 28.48,  $p < 0.001$ ).

### Relationship between obesity status and vitamin D deficiency

As shown in Table 2, after controlling for potential confounding factors, obesity status shows a significant positive correlation with vitamin D deficiency (model 3: OR = 2.318, 95% CI: 1.317, 4.082). Subgroup analysis by gender and adjustment for all confounding factors reveal that in males, this positive correlation remains significant (males: OR = 2.713, 95% CI: 1.398, 5.217), whereas in females, it is not significant (females: OR = 1.833, 95% CI: 0.4607, 8.273).

**Table 2. Association between obesity status and vitamin D deficiency.**

|             | Model 1 OR (95%CI, P)     | Model 2 OR (95%CI, P)     | Model 3 OR (95%CI, P)      |
|-------------|---------------------------|---------------------------|----------------------------|
| Non-obesity | Reference                 | Reference                 | Reference                  |
| obesity     | 1.344(0.989, 1.827) 0.059 | 1.393(1.020, 1.903) 0.367 | 2.318 (1.317, 4.082) 0.004 |
| Males       |                           |                           |                            |
| Non-obesity | Reference                 | Reference                 | Reference                  |
| obesity     | 1.669(1.123, 2.482) 0.011 | 1.627(1.090, -2.429)0.017 | 2.713 (1.306, 5.638) 0.007 |
| Females     |                           |                           |                            |
| Non-obesity | Reference                 | Reference                 | Reference                  |
| obesity     | 0.987(0.602,1.621)0.960   | 1.136(0.685, -1.883)0.621 | 1.716 (0.647, 4.556) 0.278 |

**Notes:** Model 1:No covariates were adjusted. Model 2: Age, gender was adjusted. Model 3: Age, gender, educational level, ratio of family income to poverty, physical activity, Serum uric acid, Serum sodium, glycohemoglobin, fasting glucose, triglyceride, Total Cholesterol, HDL-Cholesterol, LDL-Cholesterol were adjusted.

<https://doi.org/10.1371/journal.pone.0301327.t002>

### Associations of obesity status with 25OHD

As shown in Table 3, obesity status showed a negative association with 25-hydroxyvitamin D in all three models (model 1:  $\beta = -4.535$ , 95% CI: -6.987, -2.083; model 2  $\beta = -4.249$ , 95% CI: -6.549, -2.039; model 3  $\beta = -1.734$ , 95% CI: -7.285, 3.816). Further analysis by gender and adjustment for all confounders revealed that this negative association persisted among females (females:  $\beta = -4.091$ , 95% CI: -13.398, 5.217), but became positive among males (males:  $\beta = 1.833$ , 95% CI: -4.607, 8.273).

### Associations of BMI with 25OHD

As shown in Table 4, there was no significant association between BMI and 25OHD in either gender, with or without obesity. This result remains consistent even after adjusting for potential confounders (males with obesity:  $\beta = -0.271$ , 95% CI: -2.449,1.907; females with obesity:  $\beta = 1.477$ , 95% CI: -1.486,4.440; males without obesity:  $\beta = 0.843$ , 95% CI: -1.010,2.696; females without obesity:  $\beta = -0.193$ , 95% CI: -2.388,2.001).

### Association of WC with 25OHD

As shown in Table 5, when all confounding variables were taken into account, there was a negative correlation between WC and 25OHD ( $\beta = -0.587$ , 95% CI: -0.974, -0.201). After stratifying by gender and obesity status, we found that the relationship between WC and 25OHD remained significantly negatively correlated for male participants regardless of their obesity

**Table 3. Association between obesity status and 25-hydroxyvitamin D (nmol/L).**

|             | Model 1 $\beta$ (95%CI, P)    | Model 2 $\beta$ (95%CI, P)    | Model 3 $\beta$ (95%CI, P)    |
|-------------|-------------------------------|-------------------------------|-------------------------------|
| Non-obesity | Reference                     | Reference                     | Reference                     |
| obesity     | -4.535(-6.987, -2.083) <0.001 | -4.249(-6.549, -2.039) <0.001 | -1.734 (-7.285, 3.816) 0.540  |
| Males       |                               |                               |                               |
| Non-obesity | Reference                     | Reference                     | Reference                     |
| obesity     | -5.545(-8.483, -2.606) <0.001 | -4.100(-6.826, -1.374)0.003   | 1.833 (-4.607, 8.273) 0.577   |
| Females     |                               |                               |                               |
| Non-obesity | Reference                     | Reference                     | Reference                     |
| obesity     | -2.829(-6.679,1.021)0.150     | -5.157(-8.613, -1.701)0.004   | -4.091 (-13.398, 5.217) 0.389 |

**Notes:** Model 1:No covariates were adjusted. Model 2: Age, gender was adjusted. Model 3: Age, gender, educational level, ratio of family income to poverty, physical activity, Serum uric acid, Serum sodium, glycohemoglobin, fasting glucose, triglyceride, Total Cholesterol, HDL-Cholesterol, LDL-Cholesterol were adjusted.

<https://doi.org/10.1371/journal.pone.0301327.t003>

**Table 4. Association between body mass index(kg/m<sup>2</sup>) and 25-hydroxyvitamin D (nmol/L).**

|                         | Model 1 $\beta$ (95%CI, P)    | Model 2 $\beta$ (95%CI, P)    | Model 3 $\beta$ (95%CI, P)   |
|-------------------------|-------------------------------|-------------------------------|------------------------------|
| Total                   | -0.414(-0.647, -0.181) <0.001 | -0.441(-0.652, -0.230) <0.001 | 0.043 (-0.939, 1.026) 0.931  |
| Males with obesity      | -0.530(-1.178,0.117)0.109     | -0.130(-0.744,0.484)0.679     | -0.271 (-2.449, 1.907) 0.808 |
| Females with obesity    | -0.411(-1.320,0.499)0.377     | -0.104(-0.921,0.714)0.804     | 1.477 (-1.486, 4.440) 0.330  |
| Males without obesity   | 0.360(-0.288,1.007)0.276      | -0.077(-0.679,0.525)0.802     | 0.843 (-1.010, 2.696) 0.373  |
| Females without obesity | 0.236 (-0.499, 0.971) 0.529   | -0.887 (-1.558, -0.217)0.010  | -0.193 (-2.388, 2.001) 0.863 |

**Notes:** Model 1:No covariates were adjusted. Model 2: Age, gender was adjusted. Model 3: Age, gender (not adjusted for in the subgroup analyses), educational level, ratio of family income to poverty, physical activity, Serum uric acid, Serum sodium, glycohemoglobin, fasting glucose, triglyceride, Total Cholesterol, HDL-Cholesterol and LDL-Cholesterol were adjusted.

<https://doi.org/10.1371/journal.pone.0301327.t004>

**Table 5. Association between waist circumference (cm) and 25-hydroxyvitamin D (nmol/L).**

|                         | Model 1 $\beta$ (95%CI, P)   | Model 2 $\beta$ (95%CI, P)     | Model 3 $\beta$ (95%CI, P)    |
|-------------------------|------------------------------|--------------------------------|-------------------------------|
| Total                   | -0.093 (-0.185, 0.000) 0.051 | -0.236 (-0.324, -0.147) <0.001 | -0.587 (-0.974, -0.201) 0.003 |
| Males with obesity      | -0.201 (-0.471, 0.068) 0.144 | -0.235 (-0.486, 0.015) 0.067   | -1.461 (-2.485, -0.436) 0.006 |
| Females with obesity    | -0.073 (-0.442, 0.295) 0.696 | -0.235 (-0.567, 0.097) 0.167   | 0.086 (-0.798, 0.970) 0.850   |
| Males without obesity   | 0.274 (0.080, 0.469) 0.006   | -0.195 (-0.391, -0.000) 0.050  | -0.855 (-1.499, -0.210) 0.010 |
| Females without obesity | 0.475 (0.225, 0.725) <0.001  | -0.278 (-0.524, -0.032) 0.027  | -0.365 (-1.098, 0.369) 0.331  |

**Notes:** Model 1:No covariates were adjusted. Model 2: Age, gender was adjusted. Model 3: Age, gender (not adjusted for in the subgroup analyses), educational level, ratio of family income to poverty, physical activity, Serum uric acid, Serum sodium, glycohemoglobin, fasting glucose, triglyceride, Total Cholesterol, HDL-Cholesterol, LDL-Cholesterol were adjusted.

<https://doi.org/10.1371/journal.pone.0301327.t005>

**Table 6. Association between weight (kg) and 25-hydroxyvitamin D (nmol/L).**

|                         | Model 1 $\beta$ (95%CI, P)     | Model 2 $\beta$ (95%CI, P)    | Model 3 $\beta$ (95%CI, P)   |
|-------------------------|--------------------------------|-------------------------------|------------------------------|
| Total                   | -0.288 (-0.358, -0.218) <0.001 | -0.122 (-0.194, -0.049) 0.001 | 0.289 (-0.040, 0.619) 0.086  |
| Males with obesity      | -0.141 (-0.311, 0.029) 0.104   | 0.035 (-0.130, 0.201) 0.676   | 0.912 (0.227, 1.597) 0.010   |
| Females with obesity    | -0.379 (-0.679, -0.080) 0.014  | -0.039 (-0.321, 0.242) 0.784  | -0.412 (-1.401, 0.577) 0.416 |
| Males without obesity   | -0.129 (-0.298, 0.040) 0.135   | 0.022 (-0.136, 0.180) 0.786   | 0.479 (-0.029, 0.988) 0.066  |
| Females without obesity | -0.330 (-0.598, -0.063) 0.016  | -0.323 (-0.563, -0.084) 0.008 | 0.031 (-0.718, 0.781) 0.935  |

**Notes:** Model 1:No covariates were adjusted. Model 2: Age, gender was adjusted. Model 3: Age, gender (not adjusted for in the subgroup analyses), educational level, ratio of family income to poverty, physical activity, Serum uric acid, Serum sodium, glycohemoglobin, fasting glucose, triglyceride, Total Cholesterol, HDL-Cholesterol, LDL-Cholesterol were adjusted.

<https://doi.org/10.1371/journal.pone.0301327.t006>

status (males with obesity:  $\beta$  = -1.461, 95% CI: -2.485, -0.436; males without obesity:  $\beta$  = -0.855, 95% CI: -1.499, -0.210), while for female participants with or without obesity, there was no significant correlation between WC and 25OHD (females with obesity:  $\beta$  = 0.086, 95% CI: -0.798, 0.970; females without obesity:  $\beta$  = -0.365, 95% CI: -1.098, 0.369).

### Association of Weight with 25OHD

As shown in [Table 6](#), after adjusting for all confounding factors, in obese males, there was a very strong positive connection between weight and 25OHD ( $\beta$  = 0.912, 95% CI: 0.227, 1.597).

However, no significant correlations were found in other groups stratified by sex and obesity status (females with obesity:  $\beta = -0.412$ , 95% CI: -1.401, 0.577; males without obesity:  $\beta = 0.479$ , 95% CI: -0.029, 0.988; female without obesity:  $\beta = 0.031$ , 95% CI: -0.718, 0.781).

## Discussion

This study examined the relationship between obesity, BMI, WC, and body weight in Asian people and 25OHD. Our findings suggest that there are gender differences in the correlation between obesity and 25OHD. Additionally, we observed a significant negative association between WC and 25OHD in among both obese and non-obese men. Furthermore, weight was significantly more positively correlated with 25OHD in obese men compared to non-obese patients.

Obesity and vitamin D deficiency have evolved into global pandemics. Our findings suggested a negative association between obesity and vitamin D, which was consistent with previous studies reporting lower serum 25-hydroxyvitamin D in obese subjects than in non-obese subjects [22,23]. Most of the vitamin D is primarily formed through UVB (wavelength 290–315nm) exposure to the skin, with a smaller portion coming from dietary sources such as liver, milk, and dietary supplements [24,25]. Several studies have suggested that low concentrations of 25OHD in obese individuals may be associated with less outdoor exercise, lower sun exposure and dietary preferences [13,26,27]. Another study suggests that vitamin D is mainly stored in adipose tissue in obese individuals, leading to low concentrations of circulating 25OHD [28]. Notably, we discovered that the link between obesity and 25OHD varied across men and women after controlling for confounders, which leads us to believe that sex hormones may have played a role. In studies in Korea and Serbia, obese women were found to be more likely to suffer from vitamin D deficiency [29,30]. However, two studies from India and Norway showed that obese men had a considerably higher frequency of vitamin D deficiency than thin men [31,32]. Besides, another study on Bahraini adults showed that 25OHD levels were significantly higher in obese men than in women [33]. The findings of these studies are contradictory. One possible reason for this is the differences in race, ethnicity, and sample size of the included populations. To determine if there is a specific gender linked to obesity and vitamin D, we need an RCT research.

WC is a simple and clinically applicable indicator for determining abdominal obesity. It has been significantly linked to both cardiovascular and all-cause mortality [34–37]. In clinical practice, waist circumference can provide additional evidence to predict higher risk phenotypes for obesity [38]. A previous meta-analysis study found a direct correlation between waist circumference and risk of vitamin D deficiency, and this correlation persisted in a subgroup analysis by sex [9]. However, our research revealed a significant negative association between WC and 25OHD only in Asian adult males. This phenomenon was even more pronounced in men with obesity. One possible reason is that Asians have a higher tendency to deposit fat in their internal organs than Europeans, making them more prone to abdominal obesity [39,40]. Men are more likely than women to accumulate fat in the abdomen [41]. According to a 2011–2018 NHANES research on obesity trends by race, there has been an alarming rise in body fat percentage among non-Hispanic Asians, particularly men. The incidence of abdominal obesity among this group increased by 29.1% during this period [2]. Another possible reason for the negative association could be low total testosterone levels observed in obese men [42–44]. Growing evidence suggested that testosterone can affect vitamin D metabolism, and low levels of testosterone can lead to decreased concentrations of 25OHD [45,46]. This is another study that seems to add to the growing literature that shows WC to be more sensitive at assessing co-morbidities of obesity than BMI.



Obesity can be visually observed through a patient's weight. High body weight may cause a decrease in vitamin D levels, but studies have shown conflicting results regarding the relationship between vitamin D status and weight gain. A previous meta-analysis study found that weight and fat loss increased circulating 25OHD concentrations [10], while a prospective cohort study in Switzerland showed no correlation between vitamin D status and weight gain [12]. After stratifying by obesity status and gender and controlling for confounding factors, it was found that weight was significantly and positively associated with 25OHD in obese men. The contradictory results among studies may be due to the heterogeneity between research, including changes in population selection, the method used to quantify 25OHD, sample size, and controlled confounders.

NHANES is a nationally representative dataset that we used in our study. We primarily derived most of the variables from objective data on anthropometric and laboratory outcomes to ensure a higher level of confidence in our results. Additionally, we used a sufficiently large sample size to identify non-Hispanic Asians, which allowed us to better understand the relationship between obesity and vitamin D—this is the main advantage of our study. Nevertheless, our research has certain limitations as well. First, since this study was cross-sectional, we were unable to draw any conclusions about the cause of the link between obesity and vitamin D. Second, due to the limitations of NHANES data collection, we had no access to important variables affecting vitamin D, such as regional latitude, season and outdoor activity. Third, using BMI alone may lead to bias when determining obesity for muscular athletes or elderly people. Fourth, physical activity status and some of the covariates were generated through self-reporting, which may have resulted in reporting bias.

## Conclusion

In conclusion, this research discovered a link between vitamin D and obesity in non-Hispanic Asian populations. The findings highlight a significant negative association between waist circumference and vitamin D, particularly among obese males. These findings suggest that reducing waist circumference may help alleviate vitamin D deficiency in obese men. However, further prospective cohort studies are necessary to validate these benefits.

## Supporting information

**S1 Data.**  
(XLS)

## Acknowledgments

We would like to thank all participants and investigators who contributed to the NHANES data.

## Author Contributions

**Conceptualization:** Linjie Qiu, Jixin Li, Wenjie Li, Jin Zhang.

**Data curation:** Lingli Qin.

**Investigation:** Wenjie Li.

**Methodology:** Meijie Li.

**Visualization:** Jixin Li.

**Writing – original draft:** Linjie Qiu, Yan Ren.

**Writing – review & editing:** Jin Zhang, Feng Gao.

## References

1. Lips P. Vitamin D status and nutrition in Europe and Asia. *The Journal of steroid biochemistry and molecular biology*. 2007; 103(3–5):620–5. Epub 2007/02/09. <https://doi.org/10.1016/j.jsbmb.2006.12.076> PMID: 17287117.
2. Liu B, Du Y, Wu Y, Snetselaar LG, Wallace RB, Bao W. Trends in obesity and adiposity measures by race or ethnicity among adults in the United States 2011–18: population based study. *Bmj*. 2021; 372:n365. Epub 2021/03/18. <https://doi.org/10.1136/bmj.n365> PMID: 33727242; PubMed Central PMCID: PMC7961695 at [www.icmje.org/col\\_disclosure](http://www.icmje.org/col_disclosure).
3. Blüher M. Obesity: global epidemiology and pathogenesis. *Nature reviews Endocrinology*. 2019; 15(5):288–98. Epub 2019/03/01. <https://doi.org/10.1038/s41574-019-0176-8> PMID: 30814686.
4. Holick MF. Vitamin D deficiency. *The New England journal of medicine*. 2007; 357(3):266–81. Epub 2007/07/20. <https://doi.org/10.1056/NEJMra070553> PMID: 17634462.
5. Via M. The malnutrition of obesity: micronutrient deficiencies that promote diabetes. *ISRN endocrinology*. 2012; 2012:103472. Epub 2012/03/31. <https://doi.org/10.5402/2012/103472> PMID: 22462011; PubMed Central PMCID: PMC3313629.
6. Cheng S, Massaro JM, Fox CS, Larson MG, Keyes MJ, McCabe EL, et al. Adiposity, cardiometabolic risk, and vitamin D status: the Framingham Heart Study. *Diabetes*. 2010; 59(1):242–8. Epub 2009/10/17. <https://doi.org/10.2337/db09-1011> PMID: 19833894; PubMed Central PMCID: PMC2797928.
7. Yetley EA. Assessing the vitamin D status of the US population. *The American journal of clinical nutrition*. 2008; 88(2):558s–64s. Epub 2008/08/12. <https://doi.org/10.1093/ajcn/88.2.558S> PMID: 18689402.
8. Golzarand M, Hollis BW, Mirmiran P, Wagner CL, Shab-Bidar S. Vitamin D supplementation and body fat mass: a systematic review and meta-analysis. *European journal of clinical nutrition*. 2018; 72(10):1345–57. Epub 2018/03/23. <https://doi.org/10.1038/s41430-018-0132-z> PMID: 29563638.
9. Hajhashemy Z, Foshati S, Saneei P. Relationship between abdominal obesity (based on waist circumference) and serum vitamin D levels: a systematic review and meta-analysis of epidemiologic studies. *Nutr Rev*. 2022; 80(5):1105–17. Epub 2021/09/20. <https://doi.org/10.1093/nutrit/nuab070> PMID: 34537844.
10. Pannu PK, Zhao Y, Soares MJ. Reductions in body weight and percent fat mass increase the vitamin D status of obese subjects: a systematic review and metaregression analysis. *Nutrition research (New York, NY)*. 2016; 36(3):201–13. Epub 2016/03/01. <https://doi.org/10.1016/j.nutres.2015.11.013> PMID: 26923506.
11. Patriota P, Rezzi S, Guessous I, Marques-Vidal P. Vitamin D and Weight Change: A Mendelian Randomization, Prospective Study. *International journal of molecular sciences*. 2022; 23(19). Epub 2022/10/15. <https://doi.org/10.3390/ijms231911100> PMID: 36232402; PubMed Central PMCID: PMC9569579.
12. Patriota P, Rezzi S, Guessous I, Marques-Vidal P. No Association between Vitamin D and Weight Gain: A Prospective, Population-Based Study. *Nutrients*. 2022; 14(15). Epub 2022/08/13. <https://doi.org/10.3390/nu14153185> PMID: 35956360; PubMed Central PMCID: PMC9370694.
13. Pourshahidi LK. Vitamin D and obesity: current perspectives and future directions. *The Proceedings of the Nutrition Society*. 2015; 74(2):115–24. Epub 2014/11/02. <https://doi.org/10.1017/S0029665114001578> PMID: 25359323.
14. Winters SJ, Chennubhatla R, Wang C, Miller JJ. Influence of obesity on vitamin D-binding protein and 25-hydroxy vitamin D levels in African American and white women. *Metabolism: clinical and experimental*. 2009; 58(4):438–42. Epub 2009/03/24. <https://doi.org/10.1016/j.metabol.2008.10.017> PMID: 19303961.
15. Cashman KD. Vitamin D Deficiency: Defining, Prevalence, Causes, and Strategies of Addressing. *Calcified tissue international*. 2020; 106(1):14–29. Epub 2019/05/10. <https://doi.org/10.1007/s00223-019-00559-4> PMID: 31069443.
16. Ahluwalia N, Dwyer J, Terry A, Moshfegh A, Johnson C. Update on NHANES Dietary Data: Focus on Collection, Release, Analytical Considerations, and Uses to Inform Public Policy. *Advances in nutrition (Bethesda, Md)*. 2016; 7(1):121–34. Epub 2016/01/17. <https://doi.org/10.3945/an.115.009258> PMID: 26773020; PubMed Central PMCID: PMC4717880.
17. Zou Q, Wang H, Su C, Du W, Ouyang Y, Jia X, et al. Longitudinal association between physical activity and blood pressure, risk of hypertension among Chinese adults: China Health and Nutrition Survey 1991–2015. *European journal of clinical nutrition*. 2021; 75(2):274–82. Epub 2020/05/15. <https://doi.org/10.1038/s41430-020-0653-0> PMID: 32404900.

18. Appropriate body-mass index for Asian populations and its implications for policy and intervention strategies. *Lancet* (London, England). 2004; 363(9403):157–63. Epub 2004/01/17. [https://doi.org/10.1016/S0140-6736\(03\)15268-3](https://doi.org/10.1016/S0140-6736(03)15268-3) PMID: 14726171.
19. Zerwekh JE. Blood biomarkers of vitamin D status. *The American journal of clinical nutrition*. 2008; 87(4):1087s–91s. Epub 2008/04/11. <https://doi.org/10.1093/ajcn/87.4.1087S> PMID: 18400739.
20. Ross AC, Manson JE, Abrams SA, Aloia JF, Brannon PM, Clinton SK, et al. The 2011 report on dietary reference intakes for calcium and vitamin D from the Institute of Medicine: what clinicians need to know. *The Journal of clinical endocrinology and metabolism*. 2011; 96(1):53–8. Epub 2010/12/02. <https://doi.org/10.1210/jc.2010-2704> PMID: 21118827; PubMed Central PMCID: PMC3046611.
21. Piercy KL, Troiano RP, Ballard RM, Carlson SA, Fulton JE, Galuska DA, et al. The Physical Activity Guidelines for Americans. *Jama*. 2018; 320(19):2020–8. Epub 2018/11/13. <https://doi.org/10.1001/jama.2018.14854> PMID: 30418471; PubMed Central PMCID: PMC9582631.
22. Bell NH, Epstein S, Greene A, Shary J, Oexmann MJ, Shaw S. Evidence for alteration of the vitamin D-endocrine system in obese subjects. *The Journal of clinical investigation*. 1985; 76(1):370–3. Epub 1985/07/01. <https://doi.org/10.1172/JCI111971> PMID: 2991340; PubMed Central PMCID: PMC423785.
23. Cipriani C, Pepe J, Piemonte S, Colangelo L, Cilli M, Minisola S. Vitamin d and its relationship with obesity and muscle. *International journal of endocrinology*. 2014; 2014:841248. Epub 2014/08/28. <https://doi.org/10.1155/2014/841248> PMID: 25161666; PubMed Central PMCID: PMC4138782.
24. MacLaughlin JA, Anderson RR, Holick MF. Spectral character of sunlight modulates photosynthesis of previtamin D3 and its photoisomers in human skin. *Science* (New York, NY). 1982; 216(4549):1001–3. Epub 1982/05/28. <https://doi.org/10.1126/science.6281884> PMID: 6281884.
25. Webb AR, Holick MF. The role of sunlight in the cutaneous production of vitamin D3. *Annual review of nutrition*. 1988; 8:375–99. Epub 1988/01/01. <https://doi.org/10.1146/annurev.nu.08.070188.002111> PMID: 2849469.
26. Florez H, Martinez R, Chacra W, Strickman-Stein N, Levis S. Outdoor exercise reduces the risk of hypovitaminosis D in the obese. *The Journal of steroid biochemistry and molecular biology*. 2007; 103(3–5):679–81. Epub 2007/02/03. <https://doi.org/10.1016/j.jsbmb.2006.12.032> PMID: 17267209.
27. Kull M, Kallikorm R, Lember M. Body mass index determines sunbathing habits: implications on vitamin D levels. *Internal medicine journal*. 2009; 39(4):256–8. Epub 2009/05/01. <https://doi.org/10.1111/j.1445-5994.2009.01900.x> PMID: 19402866.
28. Wortsman J, Matsuoka LY, Chen TC, Lu Z, Holick MF. Decreased bioavailability of vitamin D in obesity. *The American journal of clinical nutrition*. 2000; 72(3):690–3. Epub 2000/09/01. <https://doi.org/10.1093/ajcn/72.3.690> PMID: 10966885.
29. Kim B, Hwang J, Lee H, Chae GM, Kim S, Kim HS, et al. Associations between ambient air pollution, obesity, and serum vitamin D status in the general population of Korean adults. *BMC Public Health*. 2022; 22(1):1766. Epub 2022/09/18. <https://doi.org/10.1186/s12889-022-14164-y> PMID: 36115935; PubMed Central PMCID: PMC9482201.
30. Pantovic A, Zec M, Zekovic M, Obrenovic R, Stankovic S, Glibetic M. Vitamin D Is Inversely Related to Obesity: Cross-Sectional Study in a Small Cohort of Serbian Adults. *Journal of the American College of Nutrition*. 2019; 38(5):405–14. Epub 2019/01/12. <https://doi.org/10.1080/07315724.2018.1538828> PMID: 30633650.
31. Johnson LK, Hofsø D, Aasheim ET, Tanbo T, Holven KB, Andersen LF, et al. Impact of gender on vitamin D deficiency in morbidly obese patients: a cross-sectional study. *European journal of clinical nutrition*. 2012; 66(1):83–90. Epub 2011/07/28. <https://doi.org/10.1038/ejcn.2011.140> PMID: 21792214.
32. Sanghera DK, Sapkota BR, Aston CE, Blackett PR. Vitamin D Status, Gender Differences, and Cardio-metabolic Health Disparities. *Annals of nutrition & metabolism*. 2017; 70(2):79–87. Epub 2017/03/21. <https://doi.org/10.1159/000458765> PMID: 28315864; PubMed Central PMCID: PMC5480371.
33. Almesri N, Das NS, Ali ME, Gumaa K, Giha HA. Gender-Dependent Association of Vitamin D Deficiency with Obesity and Hypercholesterolemia (LDLC) in Adults. *Endocrine, metabolic & immune disorders drug targets*. 2020; 20(3):425–36. Epub 2019/10/10. <https://doi.org/10.2174/1871530319666191009154528> PMID: 31595858.
34. Cerhan JR, Moore SC, Jacobs EJ, Kitahara CM, Rosenberg PS, Adami HO, et al. A pooled analysis of waist circumference and mortality in 650,000 adults. *Mayo Clinic proceedings*. 2014; 89(3):335–45. Epub 2014/03/04. <https://doi.org/10.1016/j.mayocp.2013.11.011> PMID: 24582192; PubMed Central PMCID: PMC4104704.
35. Pischon T, Boeing H, Hoffmann K, Bergmann M, Schulze MB, Overvad K, et al. General and abdominal adiposity and risk of death in Europe. *The New England journal of medicine*. 2008; 359(20):2105–20. Epub 2008/11/14. <https://doi.org/10.1056/NEJMoa0801891> PMID: 19005195.

36. Song X, Jousilahti P, Stehouwer CD, Söderberg S, Onat A, Laatikainen T, et al. Comparison of various surrogate obesity indicators as predictors of cardiovascular mortality in four European populations. *European journal of clinical nutrition*. 2013; 67(12):1298–302. Epub 2013/10/24. <https://doi.org/10.1038/ejcn.2013.203> PMID: 24149442.
37. Zhang C, Rexrode KM, van Dam RM, Li TY, Hu FB. Abdominal obesity and the risk of all-cause, cardiovascular, and cancer mortality: sixteen years of follow-up in US women. *Circulation*. 2008; 117(13):1658–67. Epub 2008/03/26. <https://doi.org/10.1161/CIRCULATIONAHA.107.739714> PMID: 18362231.
38. Ross R, Neeland IJ, Yamashita S, Shai I, Seidell J, Magni P, et al. Waist circumference as a vital sign in clinical practice: a Consensus Statement from the IAS and ICCR Working Group on Visceral Obesity. *Nature reviews Endocrinology*. 2020; 16(3):177–89. Epub 2020/02/06. <https://doi.org/10.1038/s41574-019-0310-7> PMID: 32020062; PubMed Central PMCID: PMC7027970.
39. Lim U, Ernst T, Buchthal SD, Latch M, Albright CL, Wilkens LR, et al. Asian women have greater abdominal and visceral adiposity than Caucasian women with similar body mass index. *Nutrition & diabetes*. 2011; 1(5):e6. Epub 2011/01/01. <https://doi.org/10.1038/nutd.2011.2> PMID: 23449381; PubMed Central PMCID: PMC3302135.
40. Park YW, Allison DB, Heymsfield SB, Gallagher D. Larger amounts of visceral adipose tissue in Asian Americans. *Obesity research*. 2001; 9(7):381–7. Epub 2001/07/11. <https://doi.org/10.1038/oby.2001.49> PMID: 11445659.
41. Tchernof A, Després JP. Pathophysiology of human visceral obesity: an update. *Physiological reviews*. 2013; 93(1):359–404. Epub 2013/01/11. <https://doi.org/10.1152/physrev.00033.2011> PMID: 23303913.
42. Blouin K, Boivin A, Tchernof A. Androgens and body fat distribution. *The Journal of steroid biochemistry and molecular biology*. 2008; 108(3–5):272–80. Epub 2007/10/20. <https://doi.org/10.1016/j.jsbmb.2007.09.001> PMID: 17945484.
43. Gapstur SM, Gann PH, Kopp P, Colangelo L, Longcope C, Liu K. Serum androgen concentrations in young men: a longitudinal analysis of associations with age, obesity, and race. The CARDIA male hormone study. *Cancer epidemiology, biomarkers & prevention: a publication of the American Association for Cancer Research, cosponsored by the American Society of Preventive Oncology*. 2002; 11(10 Pt 1):1041–7. Epub 2002/10/12. PMID: 12376505.
44. Pasquali R, Casimirri F, Cantobelli S, Melchionda N, Morselli Labate AM, Fabbri R, et al. Effect of obesity and body fat distribution on sex hormones and insulin in men. *Metabolism: clinical and experimental*. 1991; 40(1):101–4. Epub 1991/01/01. [https://doi.org/10.1016/0026-0495\(91\)90199-7](https://doi.org/10.1016/0026-0495(91)90199-7) PMID: 1984562.
45. D'Andrea S, Martorella A, Coccia F, Castellini C, Minaldi E, Totaro M, et al. Relationship of Vitamin D status with testosterone levels: a systematic review and meta-analysis. *Endocrine*. 2021; 72(1):49–61. Epub 2020/09/04. <https://doi.org/10.1007/s12020-020-02482-3> PMID: 32880851.
46. Nimptsch K, Platz EA, Willett WC, Giovannucci E. Association between plasma 25-OH vitamin D and testosterone levels in men. *Clinical endocrinology*. 2012; 77(1):106–12. Epub 2012/01/10. <https://doi.org/10.1111/j.1365-2265.2012.04332.x> PMID: 22220644; PubMed Central PMCID: PMC3712348.
